# Supplementary material for: Dynamic changes in prescription opioids from 2006 to 2017 in Texas
Source: PeerJ. 2019 Dec 6;7:e8108. doi: 10.7717/peerj.8108 (PMC6901007; doi:10.7717/peerj.8108)
Supplement: Supplemental Information 1 [file peerj-07-8108-s001.xlsx]

## Sheet: Zip_analyses
	Codeine	Conv	Cod_MME	buprenorphine	Conv	bup_MME	methadone	Conv	Meth_MME	MME OUD (bup + meth)	Population	OUD/Pop		Zip	fentanyl	Conv	fent_MME	hydrocodone	hydromorphone	Conv	hym_MME	meperidine	conv	mep_MME	morphine	oxycodone	conv	OxyC_MME	oxyMor	oxyM_conv	oxyM_MME	Zip	Pain8_MME	Population	MME_Pain_Pop
	268480	0.15	40271.9	10161.8	10	101618	31493.7	10	314937	416555		#DIV/0!		750	2405.7	75	180428	234257	10747.3	4	42989.1	3508.4	0.1	350.84	74233.6	153884	1.5	230827	7403.77	3	22211.3	750	825568
	123864	0.15	18579.5	2986.39	10	29863.9	5312.99	10	53129.9	82993.8		#DIV/0!		751	613.54	75	46015.5	96352	2054.96	4	8219.84	723.51	0.1	72.351	22016.8	34696.3	1.5	52044.4	1304.7	3	3914.1	751	247214
	159199	0.15	23879.9	4117.59	10	41175.9	35480.8	10	354808	395984		#DIV/0!		752	1321.1	75	99082.5	126714	6404.73	4	25618.9	1987.73	0.1	198.773	42619.2	51325	1.5	76987.5	2110.76	3	6332.28	752	401433
	1491.54	0.15	223.731	5.27	10	52.7	92.12	10	921.2	973.9		#DIV/0!		753	46.84	75	3513	1059.59	414.67	4	1658.68	49.35	0.1	4.935	711.25	529.65	1.5	794.475				753	7965.66
	86919.3	0.15	13037.9	1672.97	10	16729.7	7127.82	10	71278.2	88007.9		#DIV/0!		754	745.67	75	55925.2	68658.1	2343.64	4	9374.56	743.42	0.1	74.342	22028	23627.7	1.5	35441.5	771.59	3	2314.77	754	206854
	36194.6	0.15	5429.19	496.59	10	4965.9	1271.84	10	12718.4	17684.3		#DIV/0!		755	108.08	75	8106	22855.7	323.85	4	1295.4	512.66	0.1	51.266	5156.77	7614.22	1.5	11421.3	20.38	3	61.14	755	54376.8
	99270.9	0.15	14890.6	2198.1	10	21981	14171	10	141710	163691		#DIV/0!		756	377.8	75	28335	47794.3	2380.5	4	9522	1693.1	0.1	169.31	14819.2	11515	1.5	17272.5	202.77	3	608.31	756	133411
	104473	0.15	15670.9	1626.99	10	16269.9	20002.6	10	200026	216296		#DIV/0!		757	617.29	75	46296.8	63856.6	1348.23	4	5392.92	846.18	0.1	84.618	15780.3	18932	1.5	28398	301.76	3	905.28	757	176385
	21170.3	0.15	3175.54	288.83	10	2888.3	1262.97	10	12629.7	15518		#DIV/0!		758	107.01	75	8025.75	12666.1	182.72	4	730.88	111.78	0.1	11.178	3678.47	3479.37	1.5	5219.06	219.82	3	659.46	758	34166.5
	79585.6	0.15	11937.8	1633.31	10	16333.1	6698.34	10	66983.4	83316.5		#DIV/0!		759	279.69	75	20976.8	43117.4	898.85	4	3595.4	833.26	0.1	83.326	10034.7	8896.7	1.5	13345.1	399.57	3	1198.71	759	104289
	199613	0.15	29941.9	7351.46	10	73514.6	12994.2	10	129942	203457		#DIV/0!		760	1691.29	75	126847	167920	5199.81	4	20799.2	2017.31	0.1	201.731	50916.9	109770	1.5	164655	4583.48	3	13750.4	760	575032
	162566	0.15	24384.9	3941.35	10	39413.5	41092.6	10	410926	450339		#DIV/0!		761	1606.86	75	120514	146175	5483.4	4	21933.6	2264.47	0.1	226.447	59509.3	82533.3	1.5	123800	3161.65	3	9484.95	761	506029
	72747.2	0.15	10912.1	2156.51	10	21565.1	8990.87	10	89908.7	111474		#DIV/0!		762	564.72	75	42354	60591.8	3042.03	4	12168.1	1020.3	0.1	102.03	17307.6	32953.2	1.5	49429.8	1033.5	3	3100.5	762	195966
	44206.9	0.15	6631.03	1147.25	10	11472.5	3300.61	10	33006.1	44478.6		#DIV/0!		763	415	75	31125	31252	1275.29	4	5101.16	554.61	0.1	55.461	13303.2	13751.9	1.5	20627.9	1170.4	3	3511.2	763	111607
	28002	0.15	4200.3	372.75	10	3727.5	1329.35	10	13293.5	17021		#DIV/0!		764	232.65	75	17448.8	20105.5	506.71	4	2026.84	250.8	0.1	25.08	6701.6	6289.92	1.5	9434.88	231.6	3	694.8	764	60637.7
	68631.1	0.15	10294.7	1099.63	10	10996.3	3193.99	10	31939.9	42936.2		#DIV/0!		765	417.51	75	31313.2	63084.7	1846.7	4	7386.8	726.57	0.1	72.657	17218.1	27265.7	1.5	40898.5	560.01	3	1680.03	765	171949
	24953.4	0.15	3743.01	270.9	10	2709	1084.91	10	10849.1	13558.1		#DIV/0!		766	113.5	75	8512.5	14555.7	234.02	4	936.08	229.41	0.1	22.941	4712.07	6008.43	1.5	9012.65	105.67	3	317.01	766	41811.9
	41843.6	0.15	6276.54	446.9	10	4469	8235.55	10	82355.5	86824.5		#DIV/0!		767	217.33	75	16299.8	43674.1	380.82	4	1523.28	394.14	0.1	39.414	14980.4	8119.35	1.5	12179	120.32	3	360.96	767	95333.4
	27298.4	0.15	4094.76	142.23	10	1422.3	1465.11	10	14651.1	16073.4		#DIV/0!		768	171.78	75	12883.5	14441.4	182.9	4	731.6	242.32	0.1	24.232	4928.96	4599.81	1.5	6899.72	160.66	3	481.98	768	44486.2
	29023.8	0.15	4353.56	241	10	2410	4842.01	10	48420.1	50830.1		#DIV/0!		769	129.25	75	9693.75	17220.3	314.76	4	1259.04	516.36	0.1	51.636	6924.81	5561.37	1.5	8342.06	131.67	3	395.01	769	48240.2
	374594	0.15	56189.1	9195.06	10	91950.6	52053.8	10	520538	612488		#DIV/0!		770	1886.37	75	141478	233873	11722.4	4	46889.6	9282.04	0.1	928.204	57906.6	139937	1.5	209905	3685.5	3	11056.5	770	758226
	22.53	0.15	3.3795	0	10	0	1287.93	10	12879.3	12879.3		#DIV/0!		772	2.63	75	197.25	12.83														772	213.46
	177775	0.15	26666.3	8362.79	10	83627.9	16592.8	10	165928	249556		#DIV/0!		773	1090.04	75	81753	134388	4312.13	4	17248.5	1768.69	0.1	176.869	35704.3	53419.6	1.5	80129.4	2271.43	3	6814.29	773	382881
	139897	0.15	20984.6	3815.94	10	38159.4	4336.67	10	43366.7	81526.1		#DIV/0!		774	848.55	75	63641.2	84841.3	3101.72	4	12406.9	1215.46	0.1	121.546	27079.6	52476.1	1.5	78714.2	3454.44	3	10363.3	774	298153
	202141	0.15	30321.1	9144.4	10	91444	21318	10	213180	304624		#DIV/0!		775	1060.83	75	79562.2	143320	5355.62	4	21422.5	2312.45	0.1	231.245	48782.1	49999.4	1.5	74999.1	3631.65	3	10895	775	409533
	68431.9	0.15	10264.8	3536.33	10	35363.3	7811.16	10	78111.6	113475		#DIV/0!		776	302.96	75	22722	41254.7	2248.11	4	8992.44	672.48	0.1	67.248	12763.1	10973.5	1.5	16460.2	1433.33	3	4299.99	776	116824
	36229.6	0.15	5434.45	1260.48	10	12604.8	3136.3	10	31363	43967.8		#DIV/0!		777	128.87	75	9665.25	19701.5	1139.25	4	4557	584.45	0.1	58.445	6723.33	4240.39	1.5	6360.59	599.09	3	1797.27	777	54297.8
	50641.5	0.15	7596.22	1150.69	10	11506.9	1067.56	10	10675.6	22182.5		#DIV/0!		778	296.17	75	22212.8	30104.1	460.47	4	1841.88	500.02	0.1	50.002	9365.97	6337.67	1.5	9506.51	678.04	3	2034.12	778	82711.6
	22164.2	0.15	3324.63	567.45	10	5674.5	5351.2	10	53512	59186.5		#DIV/0!		779	253.31	75	18998.2	32790.5	1680.94	4	6723.76	343.42	0.1	34.342	9981.53	12648.3	1.5	18972.4	622.29	3	1866.87	779	92692.3
	64265.2	0.15	9639.78	1296.39	10	12963.9	9130.22	10	91302.2	104266		#DIV/0!		780	353.83	75	26537.2	40297.4	1008.82	4	4035.28	865.05	0.1	86.505	11490.4	13699.4	1.5	20549.1	1083.81	3	3251.43	780	115887
	55078	0.15	8261.7	1237.25	10	12372.5	7251.98	10	72519.8	84892.3		#DIV/0!		781	407.77	75	30582.8	44639.3	1269.91	4	5079.64	335.83	0.1	33.583	12242.4	15393	1.5	23089.6	1120.61	3	3361.83	781	127291
	312927	0.15	46939.1	3670.62	10	36706.2	109608	10	1.09608e+06	1.13279e+06		#DIV/0!		782	2030.52	75	152289	196655	8494.55	4	33978.2	3702.13	0.1	370.213	68850.9	97279.7	1.5	145920	7780.48	3	23341.4	782	668344
	57022.2	0.15	8553.33	585.45	10	5854.5	1335.61	10	13356.1	19210.6		#DIV/0!		783	222.1	75	16657.5	26794.8	518.91	4	2075.64	293.92	0.1	29.392	6669.21	5129.2	1.5	7693.8	351.57	3	1054.71	783	69528.4
	72621.1	0.15	10893.2	1362.24	10	13622.4	25771.2	10	257712	271335		#DIV/0!		784	601.65	75	45123.8	54398.9	1234.72	4	4938.88	1834.85	0.1	183.485	13829.5	8756.21	1.5	13134.3	926.85	3	2780.55	784	145283
	129782	0.15	19467.4	438.25	10	4382.5	6125.48	10	61254.8	65637.3		#DIV/0!		785	613.02	75	45976.5	36985.2	1488.3	4	5953.2	4249.54	0.1	424.954	10537.9	14634.5	1.5	21951.8	161.02	3	483.06	785	141780
	95099.8	0.15	14265	3480.6	10	34806	9711.67	10	97116.7	131923		#DIV/0!		786	1203.61	75	90270.7	101783	3744.24	4	14977	1028.45	0.1	102.845	42408.9	79751.9	1.5	119628	5242.1	3	15726.3	786	399161
	85765	0.15	12864.8	5145.93	10	51459.3	30988.9	10	309889	361348		#DIV/0!		787	1185.76	75	88932	95974.2	4874.05	4	19496.2	1229.13	0.1	122.913	40576.1	76822.2	1.5	115233	4672.89	3	14018.7	787	387218
	22984.2	0.15	3447.63	106.23	10	1062.3	519.64	10	5196.4	6258.7		#DIV/0!		788	100.75	75	7556.25	12191.7	165	4	660	331.54	0.1	33.154	2317.56	2451.5	1.5	3677.25	178.29	3	534.87	788	30418.5
	7360.66	0.15	1104.1	122.53	10	1225.3	235.04	10	2350.4	3575.7		#DIV/0!		789	53.68	75	4026	6998.78	193.16	4	772.64	140.36	0.1	14.036	2154.46	2728.31	1.5	4092.47	105	3	315	789	19477.5
	33981.4	0.15	5097.22	132.71	10	1327.1	1025.97	10	10259.7	11586.8		#DIV/0!		790	265.23	75	19892.2	18978	219.26	4	877.04	204.58	0.1	20.458	6723.32	6191.59	1.5	9287.39	439.36	3	1318.08	790	62193.7
	65299.9	0.15	9794.98	362.13	10	3621.3	5179.29	10	51792.9	55414.2		#DIV/0!		791	467.22	75	35041.5	35974.6	642.58	4	2570.32	1092.42	0.1	109.242	17393.5	11434	1.5	17151	612.25	3	1836.75	791	119872
	6780.98	0.15	1017.15	10.27	10	102.7	220.29	10	2202.9	2305.6		#DIV/0!		792	54.77	75	4107.75	4113.61	16.18	4	64.72	193.48	0.1	19.348	1675.82	1326.24	1.5	1989.36				792	12987.8
	25514	0.15	3827.1	136.95	10	1369.5	609.08	10	6090.8	7460.3		#DIV/0!		793	165.27	75	12395.2	15239.9	332.78	4	1331.12	337.11	0.1	33.711	3289.52	2488.14	1.5	3732.21	106.7	3	320.1	793	40168.9
	59788.2	0.15	8968.23	606.76	10	6067.6	6441.11	10	64411.1	70478.7		#DIV/0!		794	546.95	75	41021.2	45324.7	1484.94	4	5939.76	763.95	0.1	76.395	16534.1	9955.43	1.5	14933.1	179.58	3	538.74	794	133336
	13888.8	0.15	2083.32	131.62	10	1316.2	885.46	10	8854.6	10170.8		#DIV/0!		795	155.75	75	11681.2	12917.1	175.7	4	702.8	450.78	0.1	45.078	3714.8	2999.6	1.5	4499.4	28.09	3	84.27	795	35728
	36542.8	0.15	5481.42	670.54	10	6705.4	1902.3	10	19023	25728.4		#DIV/0!		796	290.01	75	21750.8	25921	390.98	4	1563.92	561.58	0.1	56.158	10987.1	8946.01	1.5	13419	89.03	3	267.09	796	79446.4
	85142.9	0.15	12771.4	1612.08	10	16120.8	9684.56	10	96845.6	112966		#DIV/0!		797	252.02	75	18901.5	53200.6	942.74	4	3770.96	2006.3	0.1	200.63	14329.6	17060.1	1.5	25590.1	634.37	3	1903.11	797	130668
	5486.49	0.15	822.973	36.32	10	363.2	56.35	10	563.5	926.7		#DIV/0!		798	17.87	75	1340.25	1489.62	56.93	4	227.72	30.5	0.1	3.05	400.17	615.88	1.5	923.82	47.11	3	141.33	798	5348.93
	116810	0.15	17521.5	497.23	10	4972.3	9441.38	10	94413.8	99386.1		#DIV/0!		799	590.19	75	44264.3	38158	1945.72	4	7782.88	1055.82	0.1	105.582	16172.2	21022.5	1.5	31533.8	657.97	3	1973.91	799	157512
	4.10357e+06		615536	101033		1.01033e+06	558523		5585229					total (calc)	27630.3		2.07227e+06	2.88467e+06	104786		419144	56612		5661.2	918185	1.34007e+06		2.01011e+06	64786.9		194361
	4.10357e+06			101033			558523							total (reported)	27630.3			2.88467e+06	104786			56612			918185	1.34007e+06			64786.9
	https://www.pdftoexcel.com/													771
	codeine	615536	1.57155e+07	3.91674
	bup	1.01033e+06	1.57155e+07	6.42888
	meth_10	5585229	1.57155e+07	35.5396
	fentanyl	2.07227e+06	1.57155e+07	13.1862
	hydrocodone	2.88467e+06	1.57155e+07	18.3556			total	558523
	hydromorphone	419144	1.57155e+07	2.66707			NTP	237029		42.4385				558523
	meperidine	5661.2	1.57155e+07	0.036023			non-NTP	321494		57.5615				558523
	morphine	918185	1.57155e+07	5.84255
	oxycodone	2.01011e+06	1.57155e+07	12.7906
	oxymorphone	194361	1.57155e+07	1.23675
		1.57155e+07
	codeine	615536		180939	1359.32
	bup	1.01033e+06		133.11
	meth_NTP
	meth_non_NTP
	fentanyl	2.07227e+06
	hydrocodone	2.88467e+06
	hydromorphone	419144
	meperidine	5661.2
	morphine	918185
	oxycodone	2.01011e+06
	oxymorphone	194361

## Sheet: Sheet1
								4.94			61.5103	3.19307
Texas Population					Population Grown						19.2637
2017		28304596	28.3	23.36	0.211473	21.1473	https://www.census.gov/quickfacts/TX
2016		27862596	27.86	23.36	0.192637	19.2637	https://www.census.gov/quickfacts/TX
2015		27.43 million	27.43	23.36	0.174229	17.4229	https://www.google.com/search?q=Texas+population+2015&rlz=1C1JZAP_enUS703US703&oq=Texas+population+2015&aqs=chrome..69i57.10902j0j4&sourceid=chrome&ie=UTF-8
2014		26.94	26.94	23.36	0.153253	15.3253	https://www.google.com/search?rlz=1C1JZAP_enUS703US703&ei=m7OSWoKHMOWH5wKYxr2ACw&q=Texas+population+2014&oq=Texas+population+2014&gs_l=psy-ab.3..0j0i22i30k1l9.4104.5942.0.7599.2.2.0.0.0.0.118.215.1j1.2.0....0...1.1.64.psy-ab..0.2.214...35i39k1j0i67k1.0._tq73tRdHIo
2013		26.47	26.47	23.36	0.133134	13.3134	https://www.google.com/search?rlz=1C1JZAP_enUS703US703&ei=pLOSWrCOIsXl5gKJyY7IBA&q=Texas+population+2013&oq=Texas+population+2013&gs_l=psy-ab.3..0j0i22i30k1l9.34493.38272.0.39526.4.3.1.0.0.0.122.325.1j2.3.0....0...1.1.64.psy-ab..0.4.347...35i39k1j0i67k1j0i20i264k1.0.6HqJYACUPZQ
2012		26.07	26.07	23.36	0.11601	11.601	https://www.google.com/search?rlz=1C1JZAP_enUS703US703&ei=zbOSWo2qE4fa5gLr1qm4Dg&q=Texas+population+2012&oq=Texas+population+2012&gs_l=psy-ab.3..0j0i22i30k1l9.24627.25750.0.26276.2.2.0.0.0.0.112.206.1j1.2.0....0...1.1.64.psy-ab..0.2.205...35i39k1j0i67k1j0i20i264k1.0.qGsvi_x5yfM
2011		25.65	25.65	23.36	0.0980308	9.80308	https://www.google.com/search?rlz=1C1JZAP_enUS703US703&ei=6LOSWr6jOYa85gKuypywBg&q=Texas+population+2011&oq=Texas+population+2011&gs_l=psy-ab.3..0j0i22i30k1l3.24568.24822.0.26193.2.2.0.0.0.0.125.231.0j2.2.0....0...1.1.64.psy-ab..0.2.230...35i39k1j0i67k1j0i20i264k1.0.1KEnZxhyXTM
2010		25145561	25.15	23.36	0.0766267	7.66267	https://www.census.gov/quickfacts/TX
2009		24.8	24.8	23.36	0.0616438	6.16438	https://www.google.com/search?rlz=1C1JZAP_enUS703US703&ei=H7SSWrvoDqPc5gL-gaS4AQ&q=texas+population+2009&oq=Texas+population+2009&gs_l=psy-ab.1.0.0i22i30k1l2.72430.75062.0.80727.4.4.0.0.0.0.111.405.1j3.4.0....0...1.1.64.psy-ab..0.4.405...0j35i39k1j0i67k1j0i20i264k1.0.SJBLQyrYbIY
2008		24.31	24.31	23.36	0.0406678	4.06678	https://www.google.com/search?rlz=1C1JZAP_enUS703US703&ei=cbSSWqzYDMiB5wKUqr7YBA&q=texas+population+2008&oq=texas+population+2008&gs_l=psy-ab.3..0i22i30k1.21449.23198.0.29202.2.2.0.0.0.0.112.210.1j1.2.0....0...1.1.64.psy-ab..0.2.210...0.0.mHfODtK9LNM
2007		23.83	23.83	23.36	0.0201199	2.01199	https://www.google.com/search?rlz=1C1JZAP_enUS703US703&ei=j7SSWr7hM8qK5wLJm6DICg&q=texas+population+2007&oq=texas+population+2007&gs_l=psy-ab.3..0i22i30k1l3.21062.22611.0.23042.2.2.0.0.0.0.130.227.1j1.2.0....0...1.1.64.psy-ab..0.2.226...0j35i39k1.0.Du4c5xupusc
2006		23.36	23.36	23.36	0	0	https://www.google.com/search?rlz=1C1JZAP_enUS703US703&ei=qLSSWt7OA-PO5gK1jIi4Cg&q=texas+population+2006&oq=texas+population+2006&gs_l=psy-ab.3..0i22i30k1.22159.23753.0.24449.2.2.0.0.0.0.105.202.1j1.2.0....0...1.1.64.psy-ab..0.2.201...0j35i39k1.0.2sCrB_qrukY
		all	% change		Addiction				Pain
2017									9554.3	5882.17	0.624282	62.4282
2016	10159.9	6422.8	0.581844	58.1844	659.56	540.63	0.219984	21.9984	9500.31	5882.17	0.615103	61.5103
2015	10207.3	6422.8	0.589231	58.9231	702.44	540.63	0.299299	29.9299	9504.87	5882.17	0.615878	61.5878
2014	8654.47	6422.8	0.347461	34.7461	695.84	540.63	0.287091	28.7091	7958.63	5882.17	0.353009	35.3009
2013	8421.5	6422.8	0.311188	31.1188	686.68	540.63	0.270148	27.0148	7734.82	5882.17	0.31496	31.496
2012	8470.36	6422.8	0.318796	31.8796	667.93	540.63	0.235466	23.5466	7802.43	5882.17	0.326454	32.6454
2011	8677.86	6422.8	0.351102	35.1102	640.44	540.63	0.184618	18.4618	8037.42	5882.17	0.366404	36.6404
2010	8069.43	6422.8	0.256373	25.6373	654.83	540.63	0.211235	21.1235	7414.6	5882.17	0.260521	26.0521
2009	7762.08	6422.8	0.20852	20.852	620.05	540.63	0.146903	14.6903	7142.03	5882.17	0.214183	21.4183
2008	7420.77	6422.8	0.155379	15.5379	599.81	540.63	0.109465	10.9465	6820.96	5882.17	0.159599	15.9599
2007	7420.85	6422.8	0.155392	15.5392	579.55	540.63	0.0719901	7.19901	6841.3	5882.17	0.163057	16.3057
2006	6422.8	6422.8	0	0	540.63	540.63	0	0	5882.17	5882.17	0	0
	methadone				buprenorphine				hydromorphone				oxymorphone				fentanyl
2017	562.018	527.73	6.49734		105.336	12.9	716.561		95.4098	46.15	106.738		46.1683	3.33	1286.43		23.0261	22.25	3.48827
2016	558.52	527.73	5.83442		101.03	12.9	683.178		104.79	46.15	127.064		64.79	3.33	1845.65		27.63	22.25	24.1798
2015	603.65	527.73	14.3861		98.79	12.9	665.814		107.77	46.15	133.521		68.11	3.33	1945.35		28.46	22.25	27.9101
2014	600.53	527.73	13.7949		95.31	12.9	638.837		105.64	46.15	128.906		66.29	3.33	1890.69		28.27	22.25	27.0562
2013	595.95	527.73	12.9271		90.73	12.9	603.333		105.86	46.15	129.382		67.74	3.33	1934.23		30.59	22.25	37.4831
2012	587.56	527.73	11.3372		80.37	12.9	523.023		100.83	46.15	118.483		61.04	3.33	1733.03		28.26	22.25	27.0112
2011	571.34	527.73	8.2637		69.1	12.9	435.659		87.11	46.15	88.7541		72.98	3.33	2091.59		27.58	22.25	23.9551
2010	596.92	527.73	13.1109		57.91	12.9	348.915		73.26	46.15	58.7432		60.8	3.33	1725.83		27.85	22.25	25.1685
2009	571.92	527.73	8.3736		48.31	12.9	274.496		63.46	46.15	37.5081		51.82	3.33	1456.16		25.97	22.25	16.7191
2008	563.06	527.73	6.69471		36.75	12.9	184.884		61.26	46.15	32.7411		40.44	3.33	1114.41		26.1	22.25	17.3034
2007	558.28	527.73	5.78895		21.28	12.9	64.9612		52.31	46.15	13.3478		22.42	3.33	573.273		24.84	22.25	11.6404
2006	527.73	527.73	0		12.9	12.9	0		46.15	46.15	0		3.33	3.33	0		22.25	22.25	0
	oxycodone				morphine				meperidine				hydrocodone				codeine
2017	1324.32	922.21	43.6025		821.137	765.76	7.23169		46.3303	235.82	-80.3535		2658.31	3064.04	-13.2417		4007.56	822.08	387.49
2016	1340.07	922.21	45.3107		918.19	765.76	19.9057		56.61	235.82	-75.9944		2884.67	3064.04	-5.85404		4103.57	822.08	399.169
2015	1301.6	922.21	41.1392		956.2	765.76	24.8694		69.22	235.82	-70.6471		3052.6	3064.04	-0.373363		3920.89	822.08	376.947
2014	1196.9	922.21	29.7861		980.62	765.76	28.0584		78.51	235.82	-66.7077		4038.65	3064.04	31.808		1463.65	822.08	78.0423											4.01554
2013	1166.36	922.21	26.4744		999.2	765.76	30.4847		94.08	235.82	-60.1052		4560.72	3064.04	48.8466		710.27	822.08	-13.6009
2012	1194.76	922.21	29.554		1027.12	765.76	34.1308		109.92	235.82	-53.3882		4500.72	3064.04	46.8884		770.46	822.08	-6.27919
2011	1174.16	922.21	27.3202		1012.61	765.76	32.2359		131.53	235.82	-44.2244		4701.11	3064.04	53.4285		830.33	822.08	1.00355
2010	1122.5	922.21	21.7185		993.31	765.76	29.7156		146.7	235.82	-37.7915		4246.56	3064.04	38.5935		743.65	822.08	-9.54043
2009	1065.01	922.21	15.4845		963.96	765.76	25.8828		173.19	235.82	-26.5584		4022.4	3064.04	31.2777		776.23	822.08	-5.57732
2008	1029.16	922.21	11.5971		912.2	765.76	19.1235		199.79	235.82	-15.2786		3724.35	3064.04	21.5503		827.68	822.08	0.681199
2007	1154.38	922.21	25.1754		844.65	765.76	10.3022		218.47	235.82	-7.35731		3690.69	3064.04	20.4518		833.53	822.08	1.39281
2006	922.21	922.21	0		765.76	765.76	0		235.82	235.82	0		3064.04	3064.04	0		822.08	822.08	0
	Pain																						Pain
			hydromorphone		hydromorphone	oxymorphone		oxymorphone	fentanyl	fentanyl	fentanyl	oxycodone		oxycodone	morphine	meperidine		meperidine	hydrocodone	codeine	codeine	codeine	Total 9							OUD	Pain & OUD
	Methadone_MME_g	meth_MME_kg	g	conv	MME_kg	kg	conv	mme	kg	conv	mme	kg	conv	mme	kg_MME	kg	conv	MME_kg	kg_MME	kg	conv	kg_MME	MME_kg	peak	% peak	change v prior		2006	Percent of '06	Total_2
2017		1225.51	95.4098	4	381.639	46.1683	3	138.505	23.0261	75	1726.96	1324.32	1.5	1986.47	821.137	46.3303	0.1	4.63303	2658.31	4007.56	0.15	601.134	9544.3	12368	77.1691			9448.65	1.01233	5959.32	15503.6	12572.4	23.3144
2016	1.44533e+06	1445.33	104.79	4	419.16	64.79	3	194.37	27.63	75	2072.25	1340.07	1.5	2010.11	918.19	56.61	0.1	5.661	2884.67	4103.57	0.15	615.535	10565.3	12368	85.424	2.96399		9448.65	11.8178	5544.61	16109.9	12572.4	28.1366
2015	1.60569e+06	1605.69	107.77	4	431.08	68.11	3	204.33	28.46	75	2134.5	1301.6	1.5	1952.4	956.2	69.22	0.1	6.922	3052.6	3920.89	0.15	588.133	10931.9	12368	88.388	4.79201		9448.65	15.6976	5823.21	16755.1	12572.4	33.2683
2014	1.74084e+06	1740.84	105.64	4	422.56	66.29	3	198.87	28.27	75	2120.25	1196.9	1.5	1795.35	980.62	78.51	0.1	7.851	4038.65	1463.65	0.15	219.548	11524.5	12368	93.18	5.15766		9448.65	21.9702	5548.18	17072.7	12572.4	35.7949
2013	1816118	1816.12	105.86	4	423.44	67.74	3	203.22	30.59	75	2294.25	1166.36	1.5	1749.54	999.2	94.08	0.1	9.408	4560.72	710.27	0.15	106.54	12162.4	12368	98.3376	0.0135318		9448.65	28.7214	5334.53	17497	12572.4	39.1693
2012	2.01163e+06	2011.63	100.83	4	403.32	61.04	3	183.12	28.26	75	2119.5	1194.76	1.5	1792.14	1027.12	109.92	0.1	10.992	4500.72	770.46	0.15	115.569	12164.1	12368	98.3512	1.64888		9448.65	28.7391	4836.99	17001.1	12572.4	35.2252
2011	2.1195e+06	2119.5	87.11	4	348.44	72.98	3	218.94	27.58	75	2068.5	1174.16	1.5	1761.24	1012.61	131.53	0.1	13.153	4701.11	830.33	0.15	124.549	12368	12368	100			9448.65	30.8975	4367.86	16735.9	12572.4	33.1159
2010	2.34796e+06	2347.96	73.26	4	293.04	60.8	3	182.4	27.85	75	2088.75	1122.5	1.5	1683.75	993.31	146.7	0.1	14.67	4246.56	743.65	0.15	111.547	11962	12368	96.7169			9448.65	26.6	4219.97	16182	12572.4	28.7099
2009	2.21383e+06	2213.83	63.46	4	253.84	51.82	3	155.46	25.97	75	1947.75	1065.01	1.5	1597.51	963.96	173.19	0.1	17.319	4022.4	776.23	0.15	116.434	11288.5	12368	91.2716			9448.65	19.4722	4023.61	15312.1	12572.4	21.7912
2008	2.20186e+06	2201.86	61.26	4	245.04	40.44	3	121.32	26.1	75	1957.5	1029.16	1.5	1543.74	912.2	199.79	0.1	19.979	3724.35	827.68	0.15	124.152	10850.1	12368	87.7272			9448.65	14.8327	3821.39	14671.5	12572.4	16.6961
2007	2.34779e+06	2347.79	52.31	4	209.24	22.42	3	67.26	24.84	75	1863	1154.38	1.5	1731.57	844.65	218.47	0.1	21.847	3690.69	833.53	0.15	125.029	10901.1	12368	88.1391			9448.65	15.3718	3390.39	14291.5	12572.4	13.6731
2006	2.2253e+06	2225.3	46.15	4	184.6	3.33	3	9.99	22.25	75	1668.75	922.21	1.5	1383.32	765.76	235.82	0.1	23.582	3064.04	822.08	0.15	123.312	9448.65	12368	76.3957			9448.65	-8.04348e-06	3123.78	12572.4	12572.4	1.17718e-05
																						MME total	MME total	15503.6
																						methadone (NTP): 31.64%	4905.96	15503.6	31.6439
																						hydrocodone: 17.15%	2658.31	15503.6	17.1464
																						fentanyl: 11.14%	1726.96	15503.6	11.1391
																						oxycodone: 12.81%	1986.47	15503.6	12.813	29.9593
																			1.22551e+06			methadone (pain): 7.90%	1225.51	15503.6	7.90466
																						buprenorphine: 6.79%	1053.36	15503.6	6.7943
																						morphine: 5.30%	821.137	15503.6	5.29642
																						codeine: 3.88%	601.134	15503.6	3.87738
																						hydromorphone: 2.46%	381.639	15503.6	2.46161
																						oxymorphone: 0.89%	138.505	15503.6	0.89337
																						meperidine: 0.03%	4.63303	15503.6	0.0298836
											methadone	39.5486			methadone (NTP): 31.64%	31.6439						total	15503.6	15503.6
											next 3	38.6406			hydrocodone: 17.15%	17.1464	41.0984							15503.6
															oxycodone: 12.81%	12.813								15503.6
															fentanyl: 11.14%	11.1391								15503.6
															methadone (pain): 7.90%	7.90466								15503.6
															buprenorphine: 6.79%	6.7943
															morphine: 5.30%	5.29642
															codeine: 3.88%	3.87738
															hydromorphone: 2.46%	2.46161
															oxymorphone: 0.89%	0.89337
															meperidine: 0.03%	0.0298836	30.8826	3.90726

## Sheet: Sheet3
	Methadone				MME	MME	MME	MME
		Total_grams	NTP	non-NTP	NTP conv	NTP	pain conv	pain	Ratio			Entire US
	2017	562018	408830	153189	12	4.90596e+06	8	1.22551e+06	4.0032
	2016	558523	377857	180666	12	4.53428e+06	8	1.44533e+06	3.1372			NTP	1.09609e+07
603.65	2015	603654	402943	200712	12	4.83531e+06	8	1.60569e+06	3.01136
600.53	2014	600525	382921	217605	12	4.59505e+06	8	1.74084e+06	2.63956
595.95	2013	595949	368934	227015	12	4.42721e+06	8	1816118	2.43773
587.56	2012	587564	336111	251454	12	4033329	8	2.01163e+06	2.00501
571.34	2011	571340	306402	264938	12	3.67683e+06	8	2.1195e+06	1.73476
596.92	2010	596902	303407	293495	12	3.64089e+06	8	2.34796e+06	1.55066
571.92	2009	571917	295188	276729	12	3.54226e+06	8	2.21383e+06	1.60006
563.06	2008	563057	287825	275232	12	3453900	8	2.20186e+06	1.56863
558.28	2007	558275	264801	293474	12	3.17761e+06	8	2.34779e+06	1.35345
527.73	2006	527727	249565	278163	12	2.99477e+06	8	2.2253e+06	1.34578
		1.63817	1.61458
	Buprenorphine
		grams	Bup_Conv	Bup_MME_grams	BUP_MME_kg	meth_MME_kg	Total_OUD		Percent_change
	2017	105336	10	1.05336e+06	1053.36	4905.96	5959.32	3123.78	190.773	90.7727
101.03	2016	101033	10	1.01033e+06	1010.33	4534.28	5544.61	3123.78	177.497	77.4969
98.79	2015	98789.8	10	987898	987.898	4835.31	5823.21	3123.78	186.415	86.4155
95.31	2014	95313.6	10	953136	953.136	4595.05	5548.18	3123.78	177.611	77.6113
90.73	2013	90732	10	907320	907.32	4427.21	5334.53	3123.78	170.772	70.7716
80.37	2012	80366	10	803660	803.66	4033.33	4836.99	3123.78	154.844	54.8441
69.1	2011	69103	10	691030	691.03	3676.83	4367.86	3123.78	139.826	39.826
57.91	2010	57908.1	10	579081	579.081	3640.89	4219.97	3123.78	135.092	35.0917
48.31	2009	48134.5	10	481345	481.345	3542.26	4023.61	3123.78	128.806	28.8057
36.75	2008	36749.4	10	367494	367.494	3453.9	3821.39	3123.78	122.332	22.3324
21.28	2007	21277.5	10	212775	212.775	3177.61	3390.39	3123.78	108.535	8.53479
12.9	2006	12900.7	10	129007	129.007	2994.77	3123.78	3123.78	100	7.1708e-05
bup	total	105336
bup	NTP	863.02
